# Supplementary material for: Inter‐rater agreement and reliability of thoracic ultrasonographic findings in feedlot calves, with or without naturally occurring bronchopneumonia
Source: PubMed Central journal article supplement — J Vet Intern Med. 2018 Aug 22;32(5):1787–92. doi: 10.1111/jvim.15257 (PMC6189347; doi:10.1111/jvim.15257), 2018-08-22
Supplement: JVIM-32-1787-s001.pdf [file JVIM-32-1787-s001.pdf]

# Thoracic ultrasound: inter-rater reliability and agreement

Guideline to score the video-loops

XXXX et al., JVIM

# Videoloops

- 50 loops randomly chosen among 400+ (16 seconds loops)
- $n=50$  comes from sample size calculation for finding a kappa of 0.6 to 1 with lower bound 95% CI: 0.4)
- **Bold sentences: indicates how the xls file should be filled**

# How to score?

Each loop should be scored using the xls spreadsheet below

| <b>Comet-tails</b>                      | <b>Pleural irregularity</b>         | <b>Pleural fluid</b>      | <b>Consolidation</b>       |                           | <b>Cavitary lesion</b>              | <b>Time to perform assessment</b> |                         |
|-----------------------------------------|-------------------------------------|---------------------------|----------------------------|---------------------------|-------------------------------------|-----------------------------------|-------------------------|
| <b>Maximal number on 1 frozen image</b> | <b>absence (0)<br/>presence (1)</b> | <b>Maximal depth (cm)</b> | <b>Area cm<sup>2</sup></b> | <b>Maximal depth (cm)</b> | <b>absence (0)<br/>presence (1)</b> | <b>min</b>                        | <b>Comment (if any)</b> |

# Comet-tails

| Comet-tails                      | Pleural irregularity        | Pleural fluid      | Consolidation        |                    | Cavitary lesion             | Time to perform assessment |                  |
|----------------------------------|-----------------------------|--------------------|----------------------|--------------------|-----------------------------|----------------------------|------------------|
| Maximal number on 1 frozen image | absence (0)<br>presence (1) | Maximal depth (cm) | Area cm <sup>2</sup> | Maximal depth (cm) | absence (0)<br>presence (1) | min                        | Comment (if any) |

- Note the maximal number seen per frozen screen on the entire loop.
- Notation **0, 1, ..., 10....**
- Ex: here 3 or 4

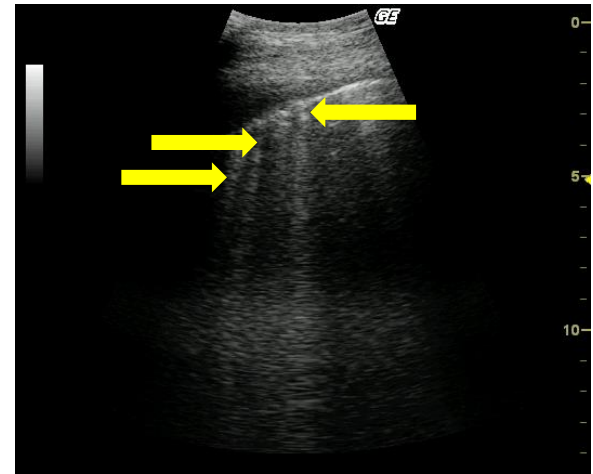

# Comet-tails

- By definition, a comet-tail is seen at the pleural surface:
  - If found at the interface between consolidated and non consolidated lung it is not a comet-tail *exemple 1*
  - If seen at the visceral pleural in case of pleural effusion => this is not a comet-tail *exemple 2*

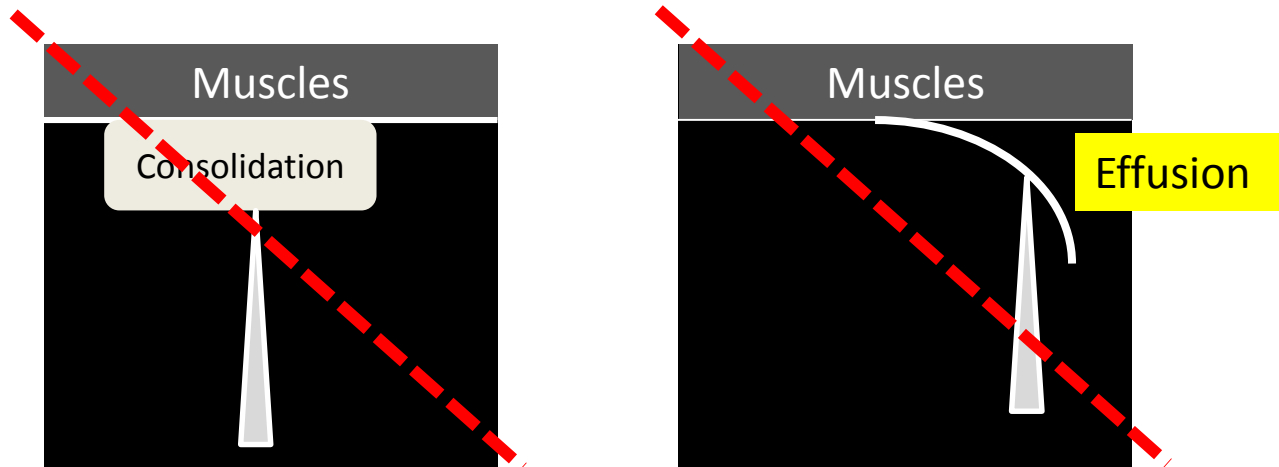

These artefacts although similar are not considered as true respiratory comet-tails.

# Pleural irregularity

| Comet-tails                      | Pleural irregularity        | Pleural fluid      | Consolidation        |                    | Cavitary lesion             | Time to perform assessment |                  |
|----------------------------------|-----------------------------|--------------------|----------------------|--------------------|-----------------------------|----------------------------|------------------|
| Maximal number on 1 frozen image | absence (0)<br>presence (1) | Maximal depth (cm) | Area cm <sup>2</sup> | Maximal depth (cm) | absence (0)<br>presence (1) | min                        | Comment (if any) |

- Presence yes=1, no=0

# Pleural effusion

| Comet-tails                      | Pleural irregularity        | Pleural fluid      | Consolidation        |                    | Cavitory lesion             | Time to perform assessment |                  |
|----------------------------------|-----------------------------|--------------------|----------------------|--------------------|-----------------------------|----------------------------|------------------|
| Maximal number on 1 frozen image | absence (0)<br>presence (1) | Maximal depth (cm) | Area cm <sup>2</sup> | Maximal depth (cm) | absence (0)<br>presence (1) | min                        | Comment (if any) |

- Maximal depth of liquid found in a frozen screen (it is helpful to use the 1cm squared screen)

# Consolidation

| Comet-tails                      | Pleural irregularity        | Pleural fluid      | Consolidation        |                    | Cavitary lesion             | Time to perform assessment |                  |
|----------------------------------|-----------------------------|--------------------|----------------------|--------------------|-----------------------------|----------------------------|------------------|
| Maximal number on 1 frozen image | absence (0)<br>presence (1) | Maximal depth (cm) | Area cm <sup>2</sup> | Maximal depth (cm) | absence (0)<br>presence (1) | min                        | Comment (if any) |

- If absence=0
- Quantification in cm (depth) 0.25,... 1,...7cm
- Freeze on the screen with the maximal area of consolidation then counting the squared affected by consolidation 17, 35, 37cm<sup>2</sup>



# Cavitary lesions

| Comet-tails                      | Pleural irregularity        | Pleural fluid      | Consolidation        |                    | Cavitary lesion             | Time to perform assessment |                  |
|----------------------------------|-----------------------------|--------------------|----------------------|--------------------|-----------------------------|----------------------------|------------------|
| Maximal number on 1 frozen image | absence (0)<br>presence (1) | Maximal depth (cm) | Area cm <sup>2</sup> | Maximal depth (cm) | absence (0)<br>presence (1) | min                        | Comment (if any) |

- 0 ou 1 (absence or presence)
- Corresponds to abcedative lesions

# Time

| Comet-tails                      | Pleural irregularity        | Pleural fluid      | Consolidation        |                    | Cavitary lesion             | Time to perform assessment |                  |
|----------------------------------|-----------------------------|--------------------|----------------------|--------------------|-----------------------------|----------------------------|------------------|
| Maximal number on 1 frozen image | absence (0)<br>presence (1) | Maximal depth (cm) | Area cm <sup>2</sup> | Maximal depth (cm) | absence (0)<br>presence (1) | min                        | Comment (if any) |

- Record time to perform the full loop assessment **ex: 0.5min, 1, ..., 4min**

# Comment

| Comet-tails                      | Pleural irregularity        | Pleural fluid      | Consolidation        |                    | Cavitary lesion             | Time to perform assessment |                  |
|----------------------------------|-----------------------------|--------------------|----------------------|--------------------|-----------------------------|----------------------------|------------------|
| Maximal number on 1 frozen image | absence (0)<br>presence (1) | Maximal depth (cm) | Area cm <sup>2</sup> | Maximal depth (cm) | absence (0)<br>presence (1) | min                        | Comment (if any) |

- Free text:
  - Heart visible
  - Difficult to assess...
  - Other...
