# Supplementary material for: Inter‐rater agreement and reliability of thoracic ultrasonographic findings in feedlot calves, with or without naturally occurring bronchopneumonia
Source: PubMed Central journal article supplement — J Vet Intern Med. 2018 Aug 22;32(5):1787–92. doi: 10.1111/jvim.15257 (PMC6189347; doi:10.1111/jvim.15257), 2018-08-22
Supplement: JVIM-32-1787-s002.pdf [file JVIM-32-1787-s002.pdf]

| id              | tail_1 | irr_1 | liq_d_1 | area_1 | depth_1 | cav_1 | L_1  | tail_2 | irr_2 | liq_d_2 | area_2 | depth_2 | cav_2 | L_2 | tail_3 | irr_3 | liq_d_3 | area_3 | depth_3 | cav_3 | L_3 | tail_4 | irr_4 | liq_d_4 | area_4 | depth_4 | cav_4 | L_4 | tail_5 | irr_5 | liq_d_5 | area_5 | depth_5 | cav_5 | L_5 | tail_6 | irr_6 | liq_d_6 | area_6 | depth_6 | cav_6 | L_6 |     |   |
|-----------------|--------|-------|---------|--------|---------|-------|------|--------|-------|---------|--------|---------|-------|-----|--------|-------|---------|--------|---------|-------|-----|--------|-------|---------|--------|---------|-------|-----|--------|-------|---------|--------|---------|-------|-----|--------|-------|---------|--------|---------|-------|-----|-----|---|
| 20150923-162    | 0      | 0     | 0       | 35     | 7       | 0     | 0.75 | 0      | 0     | 0       | 0      | 0       | 0     | 3   | 0      | 0     | 0       | 35     | 7       | 0     | 5   | 0      | 0     | 0       | 30     | 6       | 1     | 2   | 0      | 0     | 0       | 42     | 7       | 1     | 5   | 0      | 0     | 0       | 0      | 0       | 0     | 0   | 1.5 |   |
| 20150923-162821 | 2      | 0     | 7       | 0      | 0       | 0     | 1    | 3      | 1     | 4       | 0      | 0       | 0     | 9   | 1      | 1     | 4       | 28     | 5.5     | 0     | 3   | 0      | 0     | 4       | 14     | 4       | 1     | 3   | 3      | 1     | 4       | 8      | 4       | 0     | 3   | 2      | 0     | 4       | 0      | 0       | 0     | 1   |     |   |
| 20150928-210209 | 0      | 0     | 0       | 0.25   | 0.5     | 0     | 0.5  | 0      | 1     | 0       | 0.5    | 0.5     | 0     | 3   | 0      | 1     | 0       | 0.5    | 0.5     | 0     | 2   | 1      | 1     | 0       | 0      | 0       | 1     | 0.5 | 2      | 1     | 0       | 0      | 0       | 0     | 1   | 0      | 0     | 0       | 0.5    | 0.5     | 0     | 1.5 |     |   |
| 20151112-104251 | 0      | 0     | 0.2     | 9      | 3       | 0     | 1    | 0      | 1     | 0.5     | 12     | 3       | 0     | 7   | 1      | 0     | 0       | 12     | 3       | 0     | 2   | 0      | 0     | 0       | 12     | 3       | 0     | 1   | 0      | 1     | 0       | 12     | 3       | 1     | 2   | 0      | 1     | 0.5     | 9      | 3       | 0     | 1   |     |   |
| 20151112-142926 | 0      | 0     | 0       | 19     | 5       | 0     | 0.75 | 0      | 1     | 0       | 18     | 4       | 0     | 6   | 0      | 1     | 0       | 28     | 6       | 0     | 2   | 0      | 0     | 0       | 24     | 4       | 0     | 2   | 0      | 1     | 0       | 9      | 3       | 0     | 1   | 0      | 1     | 1       | 20     | 5       | 0     | 1   |     |   |
| 20151112-153636 | 0      | 0     | 0       | 36     | 7       | 0     | 0.5  | 5      | 1     | 0       | 23     | 6.5     | 0     | 4   | 0      | 0     | 0       | 36     | 6.5     | 0     | 1   | 0      | 0     | 0       | 36     | 6       | 0     | 1   | 0      | 0     | 0       | 42     | 7       | 0     | 2   | 0      | 0     | 0.5     | 26     | 6       | 0     | 1   |     |   |
| 20151118-150903 | 0      | 0     | 0       | 30     | 6       | 0     | 0.5  | 2      | 1     | 0       | 22     | 5       | 0     | 7   | 0      | 0     | 0       | 30     | 5.5     | 0     | 2   | 0      | 0     | 0       | 30     | 5       | 0     | 1   | 0      | 0     | 0       | 42     | 7       | 0     | 2   | 0      | 0     | 1       | 36     | 6       | 0     | 1.5 |     |   |
| 20151125-130524 | 2      | 0     | 2       | 2      | 2       | 0     | 1    | 4      | 1     | 2       | 0      | 0       | 0     | 4   | 2      | 1     | 1       | 18     | 4       | 0     | 3   | 3      | 0     | 1       | 24     | 4.5     | 0     | 3   | 3      | 1     | 1       | 36     | 6       | 0     | 2   | 2      | 1     | 1       | 6      | 3       | 0     | 1   |     |   |
| 20151127-144806 | 0      | 0     | 0       | 11     | 3       | 0     | 1    | 0      | 0     | 0       | 12     | 3       | 0     | 5   | 0      | 0     | 0       | 7      | 3       | 0     | 1   | 0      | 0     | 0.5     | 20     | 5       | 0     | 3   | 0      | 1     | 2       | 12     | 4       | 0     | 2   | 0      | 0     | 0.5     | 6      | 2       | 0     | 1.5 |     |   |
| 20151130-145023 | 0      | 0     | 0       | 0      | 0       | 0     | 0.5  | 0      | 0     | 0       | 0      | 0       | 0     | 1   | 0      | 1     | 5       | 0      | 0       | 0     | 2   | 0      | 0     | 5       | 0      | 0       | 0     | 3   | 0      | 0     | 0       | 0      | 0       | 0     | 0.5 | 1      | 1     | 0       | 0      | 0       | 0     | 1   |     |   |
| 20151201-093634 | 0      | 0     | 0       | 8      | 3       | 0     | 0.75 | 0      | 1     | 0       | 6      | 3       | 0     | 4   | 0      | 0     | 0       | 10     | 4       | 0     | 2   | 1      | 0     | 1       | 12     | 4       | 0     | 3   | 0      | 1     | 0       | 12     | 3       | 0     | 1   | 0      | 0     | 0       | 2      | 2       | 0     | 1   |     |   |
| 20151202-132501 | 1      | 0     | 0       | 4      | 3       | 0     | 1.5  | 2      | 1     | 0       | 4      | 2       | 0     | 6   | 3      | 1     | 0       | 12     | 5       | 0     | 2   | 1      | 1     | 0       | 12     | 4       | 0     | 2   | 1      | 1     | 0       | 4      | 2       | 0     | 2   | 1      | 0     | 0       | 0      | 0       | 0     | 1   |     |   |
| 20151202-142230 | 0      | 0     | 0       | 18     | 6       | 0     | 0.75 | 3      | 1     | 0       | 12     | 4       | 0     | 5   | 0      | 0     | 0       | 27     | 4.5     | 0     | 2   | 0      | 0     | 4       | 13     | 4       | 0     | 3   | 0      | 0     | 0       | 30     | 5       | 1     | 3   | 0      | 0     | 1       | 20     | 5       | 0     | 2   |     |   |
| 20151202-142419 | 0      | 1     | 2       | 0      | 0       | 0     | 1    | 0      | 0     | 1       | 0      | 0       | 0     | 3   | 0      | 1     | 4       | 9      | 3.5     | 0     | 4   | 0      | 0     | 2       | 6      | 3       | 0     | 3   | 0      | 1     | 2       | 0      | 0       | 0     | 4   | 0      | 1     | 1       | 0      | 0       | 0     | 2   |     |   |
| 20151202-145928 | 0      | 0     | 0       | 25     | 6       | 0     | 1.5  | 3      | 1     | 0       | 10     | 3       | 0     | 7   | 1      | 1     | 0       | 23     | 5.5     | 0     | 3   | 0      | 1     | 0       | 25     | 5       | 0     | 3   | 0      | 1     | 0       | 30     | 5       | 0     | 1   | 0      | 1     | 0.25    | 25     | 5       | 0     | 1   |     |   |
| 20151203-112036 | 1      | 0     | 4       | 8      | 2       | 0     | 2    | 0      | 1     | 3       | 0      | 0       | 0     | 5   | 4      | 1     | 0       | 16     | 5       | 0     | 3   | 0      | 0     | 2       | 12     | 3       | 0     | 2   | 0      | 1     | 0       | 42     | 7       | 0     | 2   | 4      | 1     | 1       | 0      | 0       | 0     | 1.5 |     |   |
| 20151203-112111 | 3      | 0     | 1       | 0      | 0       | 0     | 2    | 3      | 1     | 0       | 0      | 0       | 0     | 3   | 3      | 1     | 0       | 0      | 0       | 0     | 1   | 3      | 0     | 1       | 8      | 4       | 0     | 2   | 2      | 0     | 0       | 0      | 0       | 0     | 0   | 2      | 2     | 1       | 0      | 0       | 0     | 1   |     |   |
| 20151204-110057 | 0      | 1     | 1       | 0      | 0       | 0     | 1    | 0      | 0     | 0       | 0      | 0       | 0     | 2   | 0      | 1     | 0       | 2      | 2       | 0     | 4   | 0      | 0     | 1.5     | 12     | 4       | 0     | 2   | 0      | 1     | 0       | 0      | 0       | 0     | 0   | 2      | 0     | 0       | 0      | 0       | 0     | 0   | 1   |   |
| 20151204-134444 | 0      | 1     | 0       | 8      | 4       | 0     | 1    | 0      | 1     | 0       | 12     | 4.5     | 0     | 6   | 0      | 1     | 0       | 30     | 5       | 0     | 1   | 0      | 1     | 0       | 20     | 4       | 0     | 1   | 1      | 1     | 0       | 30     | 5       | 0     | 2   | 0      | 1     | 0       | 16     | 4       | 0     | 1.5 |     |   |
| 20151207-094459 | 0      | 0     | 5       | 2      | 1       | 0     | 1.5  | 0      | 1     | 3       | 2      | 1       | 0     | 5   | 0      | 1     | 0       | 28     | 5       | 0     | 3   | 0      | 1     | 1       | 15     | 2       | 0     | 2   | 0      | 1     | 0       | 30     | 5       | 0     | 2   | 0      | 1     | 2       | 9      | 3       | 0     | 2   |     |   |
| 20151208-105319 | 1      | 1     | 0       | 0      | 0       | 0     | 0.75 | 0      | 0     | 0       | 0      | 0       | 0     | 2   | 1      | 0     | 0       | 0      | 0       | 0     | 1   | 1      | 0     | 0       | 0      | 0       | 0     | 0.5 | 0      | 0     | 0       | 0      | 0       | 0     | 0.5 | 1      | 0     | 0       | 0      | 0       | 0     | 1   |     |   |
| 20151209-101223 | 1      | 0     | 0       | 6      | 3       | 0     | 1    | 3      | 1     | 0       | 6      | 3       | 0     | 6   | 1      | 1     | 0       | 12     | 4       | 0     | 2   | 0      | 1     | 0.5     | 0      | 0       | 1     | 1   | 1      | 1     | 0       | 10     | 5       | 0     | 0.5 | 1      | 1     | 0       | 36     | 6       | 0     | 2   |     |   |
| 20151209-111843 | 0      | 0     | 0       | 0      | 0       | 0     | 0.5  | 0      | 0     | 0       | 0      | 0       | 0     | 2   | 0      | 0     | 0       | 0      | 0       | 0     | 1   | 0      | 0     | 0.2     | 9      | 3       | 0     | 2   | 0      | 0     | 4       | 0      | 0       | 0     | 2   | 0      | 0     | 0       | 0      | 0       | 0     | 2   |     |   |
| 20151210-090932 | 4      | 1     | 0       | 4      | 2       | 0     | 1.5  | 4      | 1     | 0       | 6      | 2       | 0     | 5   | 3      | 1     | 0       | 11     | 3       | 0     | 2   | 4      | 1     | 0.5     | 16     | 4       | 0     | 3   | 3      | 0     | 0       | 0      | 0       | 0     | 1   | 3      | 1     | 0       | 0      | 0       | 0     | 1   |     |   |
| 20151210-094345 | 0      | 0     | 0       | 20     | 4       | 0     | 1    | 0      | 1     | 0       | 12     | 3       | 0     | 6   | 0      | 1     | 0       | 20     | 4       | 0     | 2   | 0      | 1     | 0       | 25     | 5       | 0     | 2   | 0      | 0     | 0       | 42     | 7       | 0     | 2   | 0      | 0     | 0       | 25     | 5       | 0     | 1   |     |   |
| 20151210-125703 | 0      | 0     | 0       | 0      | 0       | 0     | 0.5  | 0      | 0     | 0       | 0      | 0       | 0     | 3   | 0      | 0     | 0       | 0      | 0       | 0     | 1   | 0      | 0     | 0       | 0      | 0       | 0     | 0.5 | 0      | 0     | 0       | 0      | 0       | 0     | 0.5 | 0      | 0     | 0       | 0      | 0       | 0     | 1   |     |   |
| 20151211-093015 | 0      | 0     | 0       | 14     | 4       | 0     | 1    | 0      | 0     | 0       | 12     | 3       | 0     | 6   | 0      | 0     | 0       | 8      | 4       | 0     | 2   | 2      | 0     | 0       | 30     | 6       | 0     | 2   | 0      | 0     | 0       | 15     | 3       | 0     | 2   | 1      | 0     | 0       | 20     | 4       | 0     | 1   |     |   |
| 20151211-101956 | 0      | 0     | 0       | 20     | 4       | 0     | 1    | 0      | 1     | 0       | 12     | 4.5     | 0     | 5   | 0      | 0     | 0       | 18     | 4       | 0     | 2   | 0      | 0     | 0       | 30     | 5       | 0     | 1   | 0      | 1     | 0       | 36     | 6       | 0     | 1   | 0      | 0     | 0       | 20     | 4       | 0     | 1   |     |   |
| 20151211-105608 | 0      | 1     | 0       | 0      | 0       | 0     | 0.5  | 0      | 0     | 0       | 0      | 0       | 0     | 2   | 1      | 1     | 0       | 0      | 0       | 0     | 2   | 0      | 0     | 0.2     | 0      | 0       | 0     | 1   | 0      | 1     | 0       | 0      | 0       | 0     | 0   | 0      | 0     | 0       | 1      | 0.25    | 0     | 0   | 0   | 1 |
| 20151211-111430 | 0      | 0     | 0       | 0      | 0       | 0     | 0.5  | 0      | 0     | 0       | 0      | 0       | 0     | 3   | 0      | 1     | 0       | 0      | 0       | 0     | 2   | 0      | 1     | 0       | 0      | 0       | 1     | 1   | 1      | 0     | 0       | 0      | 0       | 0     | 1   | 0      | 1     | 0.25    | 0      | 0       | 0     | 1   |     |   |
| 20151211-113041 | 0      | 0     | 0       | 8      | 3       | 0     | 0.75 | 3      | 1     | 0       | 6      | 2       | 0     | 4   | 0      | 1     | 0       | 27     | 5       | 1     | 3   | 0      | 0     | 0       | 12     | 4       | 1     | 3   | 0      | 1     | 0       | 9      | 3       | 1     | 3   | 0      | 1     | 0.5     | 4      | 2       | 0     | 1.5 |     |   |
| 20151211-114429 | 0      | 0     | 0       | 2      | 2       | 0     | 1    | 0      | 0     | 0.5     | 4      | 2       | 0     | 6   | 0      | 1     | 0       | 20     | 5.5     | 0     | 2   | 0      | 1     | 0       | 15     | 5       | 0     | 2   | 0      | 0     | 0       | 25     | 5       | 0     | 2   | 0      | 1     | 0.25    | 4      | 2       | 0     | 1.5 |     |   |
| 20151211-114609 | 0      | 0     | 0       | 21     | 4       | 0     | 1    | 2      | 1     | 0       | 16     | 4       | 0     | 6   | 2      | 1     | 0       | 26     | 4.5     | 0     | 2   | 0      | 1     | 0       | 30     | 6       | 0     | 1   | 0      | 1     | 0       | 36     | 6       | 0     | 2   | 1      | 1     | 1       | 16     | 4       | 0     | 1.5 |     |   |

|                        |   |   |   |     |     |   |      |   |   |   |     |     |   |   |   |   |   |    |     |   |   |   |     |     |    |   |   |     |   |   |     |    |   |   |     |     |   |      |      |      |     |     |     |
|------------------------|---|---|---|-----|-----|---|------|---|---|---|-----|-----|---|---|---|---|---|----|-----|---|---|---|-----|-----|----|---|---|-----|---|---|-----|----|---|---|-----|-----|---|------|------|------|-----|-----|-----|
| 20151211-142626        | 0 | 1 | 0 | 0   | 0   | 0 | 1    | 0 | 1 | 0 | 0   | 0   | 0 | 3 | 0 | 1 | 0 | 2  | 2   | 0 | 2 | 0 | 0   | 0   | 6  | 3 | 0 | 1   | 0 | 1 | 0   | 0  | 0 | 0 | 0   | 0.5 | 0 | 0    | 0    | 0    | 0   | 0   | 0.5 |
| 20151211-145549        | 0 | 0 | 0 | 0   | 0   | 0 | 0.5  | 0 | 1 | 0 | 0   | 0   | 0 | 3 | 0 | 1 | 0 | 0  | 0   | 0 | 3 | 0 | 1   | 0   | 0  | 0 | 0 | 0   | 1 | 0 | 1   | 0  | 0 | 0 | 0   | 0   | 1 | 0    | 0    | 0    | 0   | 0   | 0.5 |
| 20151211-155010        | 0 | 0 | 0 | 0   | 0   | 0 | 0.5  | 0 | 0 | 0 | 0   | 0   | 0 | 2 | 0 | 0 | 0 | 0  | 0   | 2 | 0 | 0 | 0.5 | 0   | 0  | 0 | 1 | 0   | 0 | 0 | 1.5 | 0  | 0 | 0 | 1   | 0   | 0 | 0    | 0    | 0    | 0   | 0.5 |     |
| 20151214-093707        | 0 | 1 | 0 | 0   | 0   | 0 | 0.5  | 0 | 0 | 0 | 0.5 | 0.5 | 0 | 3 | 0 | 1 | 0 | 2  | 1.5 | 0 | 2 | 0 | 0   | 0.4 | 0  | 0 | 1 | 1   | 0 | 1 | 0   | 0  | 0 | 0 | 0   | 2   | 0 | 1    | 0.25 | 0.25 | 0.5 | 0   | 1   |
| 20151214-121159        | 1 | 0 | 0 | 10  | 3   | 0 | 1    | 3 | 1 | 0 | 4   | 2   | 0 | 5 | 2 | 1 | 0 | 16 | 4   | 1 | 3 | 3 | 1   | 0   | 16 | 4 | 1 | 2   | 2 | 1 | 0   | 0  | 0 | 1 | 2   | 2   | 1 | 0.5  | 6    | 3    | 0   | 1.5 |     |
| 20151215-103118        | 0 | 0 | 0 | 0   | 0   | 0 | 0.5  | 0 | 0 | 0 | 0   | 0   | 0 | 2 | 0 | 0 | 0 | 0  | 0   | 0 | 1 | 0 | 0   | 0   | 0  | 0 | 0 | 1   | 0 | 0 | 0   | 0  | 0 | 0 | 0.5 | 0   | 0 | 0    | 0    | 0    | 0   | 0.5 |     |
| 20151216-111604        | 2 | 0 | 0 | 0.5 | 0.5 | 0 | 0.5  | 3 | 1 | 0 | 0.5 | 0.5 | 0 | 6 | 2 | 1 | 0 | 1  | 0.5 | 0 | 2 | 3 | 1   | 0   | 0  | 0 | 0 | 0.5 | 2 | 0 | 0   | 0  | 0 | 1 | 1   | 2   | 1 | 0    | 0    | 0    | 0   | 1   |     |
| 20151216-114608        | 0 | 0 | 0 | 0   | 0   | 0 | 0.5  | 0 | 0 | 0 | 0   | 0   | 0 | 4 | 0 | 0 | 0 | 0  | 0   | 0 | 3 | 0 | 0   | 0   | 0  | 0 | 0 | 0.5 | 0 | 0 | 0   | 0  | 0 | 0 | 0   | 3   | 0 | 0    | 0    | 0    | 0   | 0   | 1   |
| 20151216-132055        | 0 | 0 | 0 | 9   | 3   | 0 | 0.75 | 0 | 0 | 0 | 6   | 3   | 0 | 6 | 0 | 0 | 0 | 0  | 0   | 1 | 3 | 0 | 0   | 2   | 12 | 4 | 0 | 1.5 | 0 | 1 | 0   | 10 | 5 | 1 | 2   | 0   | 0 | 0    | 6    | 3    | 0   | 2   |     |
| 20151217-091052        | 0 | 0 | 1 | 0   | 0   | 0 | 1    | 0 | 1 | 0 | 0   | 0   | 0 | 3 | 0 | 1 | 0 | 0  | 0   | 1 | 0 | 0 | 1.5 | 4   | 2  | 0 | 2 | 0   | 1 | 0 | 0   | 0  | 0 | 0 | 1   | 0   | 0 | 0.25 | 1    | 1    | 0   | 1.5 |     |
| 20151217-100044        | 0 | 0 | 0 | 1   | 1   | 0 | 0.75 | 0 | 0 | 0 | 0.5 | 0.5 | 0 | 5 | 0 | 1 | 0 | 6  | 2   | 0 | 3 | 0 | 0   | 0   | 0  | 0 | 1 | 0.5 | 0 | 1 | 0   | 9  | 3 | 0 | 2   | 0   | 0 | 0    | 1    | 1    | 0   | 1   |     |
| 20151218-100154        | 1 | 1 | 0 | 0   | 0   | 0 | 0.5  | 0 | 1 | 0 | 0   | 0   | 0 | 3 | 1 | 1 | 0 | 0  | 0   | 0 | 1 | 0 | 0   | 0   | 0  | 0 | 0 | 0.5 | 1 | 0 | 0   | 0  | 0 | 0 | 1   | 0   | 1 | 0    | 0    | 0    | 0   | 1   |     |
| 20151218-105842-U5523R | 0 | 0 | 0 | 0   | 0   | 0 | 0.5  | 0 | 0 | 0 | 0   | 0   | 0 | 2 | 0 | 0 | 0 | 0  | 0   | 0 | 1 | 0 | 0   | 0   | 0  | 0 | 0 | 0.5 | 0 | 1 | 0   | 0  | 0 | 0 | 1   | 0   | 0 | 0    | 0    | 0    | 0   | 1   |     |
| 20151222-113557-303L   | 0 | 0 | 0 | 8   | 3   | 0 | 1    | 0 | 0 | 0 | 12  | 3   | 0 | 6 | 0 | 1 | 0 | 23 | 5   | 0 | 2 | 0 | 0   | 0   | 16 | 4 | 0 | 1   | 0 | 1 | 0   | 12 | 3 | 0 | 2   | 0   | 0 | 0    | 12   | 3    | 0   | 1   |     |
| 20151223-093945-311R   | 0 | 0 | 0 | 6   | 3   | 0 | 0.75 | 0 | 0 | 0 | 6   | 3   | 0 | 5 | 0 | 0 | 0 | 7  | 4   | 0 | 2 | 0 | 0   | 0   | 0  | 0 | 1 | 1   | 0 | 0 | 0   | 0  | 0 | 0 | 2   | 0   | 0 | 0.25 | 9    | 3    | 0   | 1.5 |     |
| 20151223-104812-315L   | 0 | 0 | 0 | 10  | 2   | 0 | 0.75 | 0 | 1 | 0 | 4   | 1.5 | 0 | 4 | 0 | 1 | 0 | 14 | 4   | 0 | 2 | 0 | 0   | 0   | 12 | 4 | 0 | 1   | 0 | 1 | 0   | 20 | 4 | 0 | 1   | 0   | 0 | 0    | 9    | 3    | 0   | 1   |     |
| 20151223-115330        | 0 | 0 | 0 | 0   | 0   | 0 | 0.5  | 3 | 1 | 0 | 0   | 0   | 0 | 3 | 0 | 0 | 0 | 0  | 0   | 0 | 1 | 0 | 0   | 0.5 | 0  | 0 | 0 | 0.5 | 0 | 0 | 1   | 0  | 0 | 0 | 2   | 0   | 1 | 0.25 | 0    | 0    | 0   | 1   |     |

| Item    | Legend                                                                      |
|---------|-----------------------------------------------------------------------------|
| id      | Identification of the video loop                                            |
| tail_1  | Maximal number of comet-tails (B-lines) noted in a frozen image for rater 1 |
| irr_1   | presence of the pleural irregularity (yes=1, no=0) for rater 1              |
| liq_d_1 | Maximal depth of pleural effusion (cm) for rater 1                          |
| area_1  | Maximal area of consolidated tissue (cm <sup>2</sup> ) for rater 1          |
| depth_1 | Maximal depth of consolidated tissue (cm) for rater 1                       |
| cav_1   | Presence of cavitary lesion (yes=1, no=0) for rater 1                       |
| t_1     | time for reviewing loop for rater 1                                         |
| tail_2  | Maximal number of comet-tails (B-lines) noted in a frozen image for rater 2 |
| irr_2   | presence of the pleural irregularity (yes=1, no=0) for rater 2              |
| liq_d_2 | Maximal depth of pleural effusion (cm) for rater 2                          |
| area_2  | Maximal area of consolidated tissue (cm <sup>2</sup> ) for rater 2          |
| depth_2 | Maximal depth of consolidated tissue (cm) for rater 2                       |
| cav_2   | Presence of cavitary lesion (yes=1, no=0) for rater 2                       |
| t_2     | time for reviewing loop for rater 2                                         |
| tail_3  | Maximal number of comet-tails (B-lines) noted in a frozen image for rater 3 |
| irr_3   | presence of the pleural irregularity (yes=1, no=0) for rater 3              |
| liq_d_3 | Maximal depth of pleural effusion (cm) for rater 3                          |
| area_3  | Maximal area of consolidated tissue (cm <sup>2</sup> ) for rater 3          |
| depth_3 | Maximal depth of consolidated tissue (cm) for rater 3                       |
| cav_3   | Presence of cavitary lesion (yes=1, no=0) for rater 3                       |
| t_3     | time for reviewing loop for rater 3                                         |
| tail_4  | Maximal number of comet-tails (B-lines) noted in a frozen image for rater 4 |
| irr_4   | presence of the pleural irregularity (yes=1, no=0) for rater 4              |
| liq_d_4 | Maximal depth of pleural effusion (cm) for rater 4                          |
| area_4  | Maximal area of consolidated tissue (cm <sup>2</sup> ) for rater 4          |
| depth_4 | Maximal depth of consolidated tissue (cm) for rater 4                       |
| cav_4   | Presence of cavitary lesion (yes=1, no=0) for rater 4                       |
| t_4     | time for reviewing loop for rater 4                                         |
| tail_5  | Maximal number of comet-tails (B-lines) noted in a frozen image for rater 5 |
| irr_5   | presence of the pleural irregularity (yes=1, no=0) for rater 5              |
| liq_d_5 | Maximal depth of pleural effusion (cm) for rater 5                          |
| area_5  | Maximal area of consolidated tissue (cm <sup>2</sup> ) for rater 5          |
| depth_5 | Maximal depth of consolidated tissue (cm) for rater 5                       |
| cav_5   | Presence of cavitary lesion (yes=1, no=0) for rater 5                       |
| t_5     | time for reviewing loop for rater 5                                         |
| tail_6  | Maximal number of comet-tails (B-lines) noted in a frozen image for rater 6 |
| irr_6   | presence of the pleural irregularity (yes=1, no=0) for rater 6              |
| liq_d_6 | Maximal depth of pleural effusion (cm) for rater 6                          |
| area_6  | Maximal area of consolidated tissue (cm <sup>2</sup> ) for rater 6          |
| depth_6 | Maximal depth of consolidated tissue (cm) for rater 6                       |
| cav_6   | Presence of cavitary lesion (yes=1, no=0) for rater 6                       |
| t_6     | time for reviewing loop for rater 6                                         |
